# Supplementary material
Source: PubMed Central journal article supplement (PMC1904138)
Supplement: pnas_0611638104_1.pdf [file pnas_0611638104_1.pdf]

**Table 1. Primers used in this study (1-3)**

| Primers for genotyping genetically engineered mice |                             |                            |                             |
|----------------------------------------------------|-----------------------------|----------------------------|-----------------------------|
| p53                                                | Wild type                   | 5'-TATACTCAGAGCCGGCCT-3'   | 5'-ACAGCGTGGTGGTACCTTAT-3'  |
|                                                    | Mutant allele               | 5'-TATACTCAGAGCCGGCCT-3'   | 5'-CTATCAGGDCATAGCGTTGG-3'  |
| Ink4a                                              | Wild type                   | 5'-GGCAAATAGCGCCACCTA-3'   | 5'-GACTCCATGCTGCTCCAGAT-3'  |
|                                                    | Mutant allele               | 5'-GGCAAATAGCGCCACCTA-3'   | 5'-GCCGCTGGACCTAATAACTTC-3' |
| Arf                                                |                             | 5'-GTCGCAGGTTCTTGGTCACT-3' | 5'-ATGTTACGAAAGCCAGAGC-3'   |
| Primers for RT-PCR                                 |                             |                            |                             |
| p53                                                | 5'-GACCATCCTGGCTGTAGGTAG-3' |                            | 5'-TATTGAGGGGAGGAGAGTACG-3' |
| Arf                                                | 5'-GGTTCTTGGTCACTGTGAGG-3'  |                            | 5'-CAGAAGAGCTGCTACGTGAAC-3' |
| NRAS                                               | 5'- AATCCAGCTAATCCAGAACC-3' |                            | 5'-TGGTCTCTCATGGCACTGTA-3'  |
| GAPDH                                              | 5'-TGGAGAAACCTGCCAAGTATG-3' |                            | 5'-GAAGAGTGGGAGTTGCTGTTG-3' |

1. Vaslet CA, Messier NJ, Kane AB (2002) *Toxicol Sci* 68:331-338.

2. Sharpless NE, Bardeesy N, Lee KH, Carrasco D, Castrillon DH, Aguirre AJ, Wu EA, Horner JW, DePino RA (2001) *Nature* 413:86-91.

3. Sharpless NE, Kannan K, Xu J, Bosenberg MW, Chin L (2003) *Oncogene* 22:5055-5059.
